# Supplementary material for: Intermolecular hydrogen bond stretching vibrations observed in terahertz spectra of crystalline vitamins
Source: Royal Society of Chemistry journal article supplement (doi:10.1039/c8ce00095f), 2018-01-01
Supplement: c8ce00095f1.pdf [file c8ce00095f1.pdf]

## Electric Supplementary Information (ESI)

### Intermolecular hydrogen bond stretching vibrations observed in terahertz spectra of crystalline vitamins

*Masae Takahashi,<sup>\*,†,‡</sup> Nubuyuki Okamura,<sup>†,‡</sup> Xiaomeng Ding,<sup>†</sup> Hitoshi Shirakawa,<sup>†</sup> and  
Hiroaki Minamide<sup>‡</sup>*

Contents:

**Table S1** Terahertz Vibrations of Vitamins 1–5

**Table S2** Anharmonicity in the THz Vibrations of Vitamins 1–5

**Table S1** Terahertz Vibrations of Vitamins **1–5**

| compd                | expt              |                   |                   |                   |                   |              | calcd <sup>a</sup> |                  | description                                         |
|----------------------|-------------------|-------------------|-------------------|-------------------|-------------------|--------------|--------------------|------------------|-----------------------------------------------------|
|                      | 14 K              |                   | 77K               |                   | RT                |              | PBE-D              |                  |                                                     |
|                      | freq <sup>b</sup> | fwhm <sup>c</sup> | freq <sup>b</sup> | fwhm <sup>c</sup> | freq <sup>b</sup> | $\epsilon^d$ | freq <sup>b</sup>  | int <sup>e</sup> |                                                     |
| <b>1<sup>f</sup></b> |                   |                   |                   |                   |                   |              | 16.7               | 1.4              | T <sub>a</sub>                                      |
|                      | 34.8              | 3.0               | 35.2              | 3.7               | 34.3              | 13           | 39.2               | 15.4             | R <sub>c</sub>                                      |
|                      | 62.6              | 1.0               | 61.9              | 1.3               | 56.6              | 2            | 72.0               | 1.6              | R <sub>b</sub>                                      |
|                      | 69.5              | 1.1               | 68.9              | 1.5               | 64.3              | 4            | 76.1               | 5.4              | R <sub>a</sub> + $\nu$ (N2H...N1)                   |
|                      | 87.1              | 1.0               | 86.2              | 1.9               | 81.4              | 5            | 100.3              | 3.2              | T <sub>b</sub> + $\nu$ (N2H...N1)                   |
|                      | 97.5              |                   | 96.8              |                   |                   |              | 100.6              | 1.4              | R <sub>c</sub> + $\nu$ (C1H...O1)                   |
|                      | 106.1             | 4.3               | 105.0             | 6.3               | 96.0              | 12           | 112.3              | 27.7             | R <sub>b</sub> + $\nu$ (C1H...O1)                   |
|                      | 115.9             | 1.9               | 115.2             | 2.3               | 107.1             | 9            | 121.1              | 2.1              | $\tau$ (-CONH <sub>2</sub> )                        |
|                      | 128.2             | 9.9               | 127.4             | 10.1              | 120.9             | 18           | 137.1              | 34.6             | $\tau$ (-CONH <sub>2</sub> )                        |
| <b>2</b>             |                   |                   |                   |                   |                   |              | 76.8               | 1.2              | $\tau$ (-COOH)                                      |
|                      |                   |                   |                   |                   |                   |              | 77.5               | 8.1              | $\tau$ (-COOH)                                      |
|                      | 79.6              | 4.1               | 80.2              | 4.4               |                   |              | 78.1               | 17.8             | $\tau$ (-COOH)                                      |
|                      | 85.2              | 1.6               | 85.2              | 2.6               | 80.6              | 17           | 89.3               | 7.6              | R <sub>c</sub> + $\nu$ (C1H...O1)                   |
|                      | 94.2              | 6.3               | 93.5              | 6.6               |                   |              | 102.9              | 21.2             | R <sub>b</sub>                                      |
|                      | 123.9             | 8.3               | 122.4             | 8.7               | 114.0             | 32           | 132.6              | 91.5             | T <sub>a</sub> + $\nu$ (C5H...O1)+ $\nu$ (O2H...N1) |
|                      |                   |                   |                   |                   |                   |              | 136.8              | 1.0              | R <sub>b</sub>                                      |
|                      |                   |                   |                   |                   |                   |              | 136.8              | 4.8              | T <sub>b</sub> + $\nu$ (C1H...O1)+ $\nu$ (O2H...N1) |
|                      |                   |                   |                   |                   |                   |              | 139.4              | 5.0              | T <sub>c</sub>                                      |
|                      | 153.4             | 5.2               |                   |                   | 144.9             | 21           | 155.1              | 33.6             | R <sub>c</sub> + $\nu$ (C5H...O1)                   |
| <b>3</b>             |                   |                   | 64.6              | 1.6               | 60.0              | 9            | 63.5               | 2.8              | T <sub>a</sub>                                      |
|                      |                   |                   | 72.0              | 1.0               | 67.7              | 5            | 79.5               | 5.9              | T <sub>c</sub> + $\nu$ (C6H...O2)                   |
|                      |                   |                   | 76.2              | 0.8               |                   |              | 92.9               | 1.2              | T <sub>c</sub> + $\nu$ (C6H...O2)                   |
|                      |                   |                   | 81.9              | 1.6               | 78.0              | 7            | 91.2               | 2.4              | T <sub>c</sub>                                      |
|                      |                   |                   | 85.8              | 1.1               |                   |              | 98.2               | 2.6              | T <sub>b</sub>                                      |
|                      |                   |                   | 95.6              | 1.3               | 91.7              | 8            | 108.7              | 5.7              | R <sub>a</sub> + $\nu$ (C6H...O2)                   |
|                      |                   |                   | 100.6             | 1.0               | 96.0              | 8            | 107.5              | 2.3              | R <sub>c</sub>                                      |
|                      |                   |                   | 103.3             | 1.0               |                   |              | 122.9              | 1.8              | R <sub>a</sub>                                      |
|                      |                   |                   | 105.3             | 1.1               | 102.0             | 7            | 115.4              | 2.3              | R <sub>a</sub> + $\nu$ (C6H...O2)                   |
|                      |                   |                   | 111.7             | 1.3               | 107.1             | 9            | 116.9              | 6.5              | R <sub>c</sub>                                      |

|          |       |     |       |    |       |      |                                                                       |
|----------|-------|-----|-------|----|-------|------|-----------------------------------------------------------------------|
|          | 124.3 | 2.3 | 120.0 | 20 | 132.7 | 18.1 | $\gamma$                                                              |
|          |       |     |       |    | 135.1 | 3.7  | $\gamma$                                                              |
|          |       |     |       |    | 143.2 | 10.2 | $R_b + \nu(\text{O6H}\dots\text{O3})$                                 |
|          |       |     | 138.0 | 16 | 153.2 | 50.6 | $R_b + \nu(\text{O3H}\dots\text{O5})$                                 |
|          |       |     |       |    | 157.2 | 4.9  | $R_b$                                                                 |
|          |       |     | 148.3 | 14 | 159.9 | 15.8 | $\tau(-\text{CH}_2\text{OH})$                                         |
| <b>4</b> | 59.7  | 2.1 | 56.6  | 10 | 63.5  | 4.9  | $R_c + \nu(\text{C5H}\dots\text{O8})$                                 |
|          | 84.6  | 4.9 | 79.7  | 20 | 83.7  | 4.3  | motion of Cl                                                          |
|          | 98.9  | 6.5 | 93.4  | 30 | 105.4 | 22.5 | $R_a$                                                                 |
|          |       |     |       |    | 106.1 | 2.3  | $T_c$                                                                 |
|          |       |     |       |    | 109.4 | 22.9 | $R_b$                                                                 |
|          | 123.7 | 7.1 | 114.9 | 51 | 124.0 | 73.2 | motion of Cl + $\nu(\text{O8H}\dots\text{Cl})$                        |
| <b>5</b> |       |     |       |    | 25.3  | 1.6  |                                                                       |
|          | 34.7  | 1.1 | 33.4  | 3  | 42.7  | 4.2  | $T_b$                                                                 |
|          | 44.8  | 1.8 | 43.7  | 11 | 51.4  | 5.8  | $T_c$                                                                 |
|          | 50.6  |     |       |    |       |      |                                                                       |
|          | 54.4  | 1.7 | 51.4  | 4  | 62.2  | 2.2  | $T_a$                                                                 |
|          | 60.4  | 1.7 |       |    | 73.3  | 4.3  | $\tau(-\text{COOH})$                                                  |
|          | 64.3  | 2.4 | 58.3  | 5  | 75.3  | 2.9  | $\tau(-\text{COOH})$                                                  |
|          | 69.6  | 3.8 |       |    | 79.5  | 1.4  | $\tau(-\text{COOH})$                                                  |
|          |       |     |       |    | 82.1  | 3.7  | $R_b$                                                                 |
|          | 74.3  | 2.7 | 67.7  | 7  | 82.5  | 5.6  | $R_c + \nu(\text{N1H}\dots\text{O2})$                                 |
|          |       |     |       |    | 86.3  | 3.5  | $R_c$                                                                 |
|          |       |     |       |    | 90.0  | 4.2  | $R_a$                                                                 |
|          | 79.9  | 5.0 | 75.4  | 6  | 93.8  | 8.9  | $R_a + \nu(\text{C3H}\dots\text{N1})$                                 |
|          |       |     |       |    | 94.0  | 1.5  | $T_b$                                                                 |
|          | 97.0  | 5.4 | 92.6  | 9  | 104.0 | 13.2 | Intramolecular motion                                                 |
|          | 104.4 | 2.6 |       |    | 104.4 | 8.5  | Intramolecular motion                                                 |
|          |       |     |       |    | 116.5 | 4.4  | $T_b + \nu(\text{C4H}\dots\text{O3}) + \nu(\text{N2H}\dots\text{O2})$ |
|          | 121.5 | 2.1 | 120.9 | 9  | 124.2 | 10.4 | Intramolecular motion                                                 |

<sup>a</sup>Calculated frequencies with an intensity greater than 1 km mol<sup>-1</sup>.  $T_j$ : Intermolecular translation about the  $j$  axis;  $R_j$ : Intermolecular or lattice rotation about the  $j$  axis;  $\nu$ : stretching;  $\gamma$ : out-of-plane bending;  $\tau$ : torsion. <sup>b</sup>Frequency in cm<sup>-1</sup>. <sup>c</sup>Full width at half maximum in cm<sup>-1</sup>. <sup>d</sup>Molar extinction coefficient in M<sup>-1</sup> cm<sup>-1</sup>. <sup>e</sup>Intensity in km mol<sup>-1</sup>. <sup>f</sup>Experimental result at 14 K and calculated data are from ref 24.

**Table S2** Anharmonicity in the THz Vibrations of Vitamins **1–5<sup>a</sup>**

| compd                 | displacement/Å |              |              |
|-----------------------|----------------|--------------|--------------|
|                       | 0.005          | 0.010        | 0.015        |
| <b>1<sup>24</sup></b> | 39.2           | 39.6 (0.4)   | 41.0 (1.8)   |
|                       | 72.0           | 71.3 (–0.7)  | 71.1 (–0.9)  |
|                       | 76.1           | 74.9(–1.2)   | 73.3 (–2.8)  |
|                       | 100.3          | 99.7 (–0.6)  | 98.6 (–1.7)  |
|                       | 100.6          | 100.6 (0.0)  | 101.1 (0.5)  |
|                       | 112.3          | 112.0 (–0.3) | 111.9 (–0.4) |
|                       | 121.1          | 121.1 (0.0)  | 121.1 (0.0)  |
|                       | 137.1          | 137.2 (0.1)  | 137.5 (0.4)  |
| <b>2</b>              | 76.8           | 75.6 (–1.2)  | 75.2(–1.6)   |
|                       | 77.5           | 77.4 (–0.1)  | 77.1 (–0.4)  |
|                       | 78.1           | 77.2 (–0.9)  | 76.6 (–1.5)  |
|                       | 89.3           | 89.2 (–0.1)  | 89.1(–0.2)   |
|                       | 102.9          | 102.3 (–0.6) | 101.7(–1.2)  |
|                       | 132.6          | 133.1 (0.5)  | 133.8(1.2)   |
|                       | 136.8          | 136.3 (–0.5) | 135.7(–1.1)  |
|                       | 136.8          | 136.6 (–0.2) | 136.1(–0.7)  |
|                       | 139.4          | 139.0 (–0.4) | 138.6(–0.8)  |
|                       | 155.1          | 154.9 (–0.2) | 154.7(–0.4)  |
| 158.0                 | 157.7 (–0.3)   | 157.6(–0.4)  |              |
| <b>3</b>              | 63.5           | 63.7 (0.2)   | 64.2 (0.7)   |
|                       | 79.5           | 79.2 (–0.3)  | 78.7 (–0.8)  |
|                       | 92.9           | 92.9 (0.0)   | 93.0 (0.1)   |
|                       | 91.2           | 91.0 (–0.2)  | 90.8 (–0.4)  |
|                       | 98.2           | 97.6 (–0.6)  | 96.7 (–1.5)  |
|                       | 107.5          | 107.6 (0.1)  | 107.4 (–0.1) |
|                       | 108.7          | 108.7 (0.0)  | 108.6 (–0.1) |
|                       | 115.4          | 115.7 (0.3)  | 116.0 (0.6)  |
|                       | 122.9          | 122.4 (–0.5) | 121.9 (–1.0) |
|                       | 116.9          | 117.0 (0.1)  | 117.2 (0.3)  |
|                       | 132.7          | 132.6 (–0.1) | 132.2 (–0.5) |
|                       | 135.1          | 135.1 (0.0)  | 134.8 (–0.3) |
| 143.2                 | 143.1 (–0.1)   | 142.7 (–0.5) |              |

|          |       |              |              |
|----------|-------|--------------|--------------|
|          | 153.2 | 153.1 (-0.1) | 152.8 (-0.4) |
|          | 157.2 | 157.2 (0.0)  | 157.0 (-0.2) |
|          | 159.9 | 160.2 (0.3)  | 160.2 (0.3)  |
| <b>4</b> | 63.5  | 63.7(0.2)    | 62.7 (-0.8)  |
|          | 83.7  | 83.9 (0.2)   | 83.6 (-0.1)  |
|          | 105.4 | 105.2 (-0.2) | 104.3 (-1.1) |
|          | 106.1 | 106.1 (0.0)  | 105.3 (-0.8) |
|          | 109.4 | 109.0 (-0.4) | 108.1 (-1.3) |
|          | 124.0 | 124.0 (0.0)  | 123.7 (-0.3) |
| <b>5</b> | 42.7  | 42.8 (0.1)   | 41.6 (-1.1)  |
|          | 51.4  | 49.6 (-1.8)  | 47.8 (-3.6)  |
|          | 62.2  | 60.7 (-1.5)  | 59.9 (-2.3)  |
|          | 73.3  | 73.2 (-0.1)  | 73.4 (0.1)   |
|          | 75.3  | 75.0 (-0.3)  | 74.1 (-1.2)  |
|          | 79.5  | 79.0 (-0.5)  | 78.1 (-1.4)  |
|          | 82.1  | 82.1 (0.0)   | 81.8 (-0.3)  |
|          | 82.5  | 81.4 (-1.1)  | 80.4 (-2.1)  |
|          | 86.3  | 86.2 (-0.1)  | 85.9 (-0.4)  |
|          | 90.0  | 89.7 (-0.3)  | 89.6 (-0.4)  |
|          | 93.8  | 94.3 (0.5)   | 93.8 (0.0)   |
|          | 94.0  | 93.6 (-0.4)  | 93.5 (-0.5)  |
|          | 104.0 | 103.5 (-0.5) | 103.1 (-0.9) |
|          | 104.4 | 103.9 (-0.5) | 102.9 (-1.5) |
|          | 116.5 | 115.8 (-0.7) | 115.0 (-1.5) |
|          | 124.2 | 123.5 (-0.7) | 122.7 (-1.5) |

<sup>a</sup>Frequencies in  $\text{cm}^{-1}$  at the respective amplitude of displacement from 0.005 to 0.015 Å. The difference from the frequency at 0.005 Å of the displacement amplitude is given in parentheses.
